# Supplementary material for: Sexuell übertragbare Infektionen bei Frauen in der hausärztlichen Praxis – eine qualitative Interviewstudie mit Hausärzt:innen in Berlin
Source: Springer Nature journal article supplement (doi:10.1007/s44266-023-00162-9), 2024-01-09
Supplement: MOESM1 [file 26610132]

[Anhang 1: Leitfaden 2](#_Toc150505827)

[Anhang 2: Fallbeispiele 9](#_Toc150505828)

[Anhang 3: Codebaum 10](#_Toc150505829)

#

Anmerkung: Die Inhalte des Anhangs wurden bereits in einer englischsprachigen Publikation [1] veröffentlicht und für diesen Artikel übersetzt.

1. Meurer P, Heintze C, Schuster A (2023) Women’s sexually transmitted infections in primary care: General practitioners’ challenges and strategies – A qualitative study in Germany. Eur J Gen Pract. 29(1):2190094

# Anhang 1: Leitfaden

## Studienprojekt Sexuell übertragbare Infektionen und deren Prävention bei Frauen in der Primärversorgung

## Interviewleitfaden

### Einleitende Bemerkungen

- Im Vorfeld bereits Aufklärungsunterlagen zugesendet; „hatten Sie bereits Gelegenheit, diese durchzulesen?“
- Wichtige Punkte noch einmal gemeinsam durchgehen – „Wir interessieren uns in diesem Studienprojekt für die Rolle von Hausärzt*innen bei der Versorgung sexuell übertragbarer Infektionen bei Frauen. Da es zu diesem Thema in Deutschland bisher nicht viel Forschung gibt, führen wir Interviews mit Hausärzt*innen wie Ihnen als Expert*innen durch, um Themen und Probleme offen zu besprechen. Uns interessieren dabei besonders Ihre persönlichen Meinungen und Erfahrungen in der Praxis. Wir würden außerdem gerne, um über konkrete Situationen sprechen zu können, kurze Fallbeispiele vorstellen und diese mit Ihnen diskutieren - es geht hierbei gerade nicht um das Abprüfen von Wissen, sondern vielmehr um den Praxisalltag und die Versorgungssituation, wie Sie als Hausärzt*innen sie erleben.“
- Das Interview wird ca. eine Stunde dauern und wird aufgezeichnet. Die Daten werden ausgewertet und ggf. veröffentlicht, es wird aber kein Rückschluss auf die Person möglich sein
- Datenschutzblatt mit Kontaktdaten zeigen und auf Widerrufsrecht hinweisen; Unterschriften leisten; Information und eine Version der Einverständniserklärung verbleibt bei Teilnehmer*in
- Code auf Memoblatt notieren
- Fragen müssen nicht beantwortet werden, Interview kann jederzeit unterbrochen werden
- Zu Beginn kurzer Faktenfragebogen

| Themenblock | Erzählimpuls / Stimulus | Memospalte Erfragen, was nicht von alleine thematisiert wird | Aufrechterhaltung des Gesprächsfluss / Steuerungsfragen |
| --- | --- | --- | --- |
| A - Versorgung | Nicht-Schwerpunktpraxen:  Vielleicht können Sie mir zu Beginn einmal ein bisschen von ihrem Werdegang erzählen - Weshalb haben Sie sich dafür entschieden, als Hausarzt / Hausärztin zu arbeiten?  Stellen Sie sich vor, ich wäre als Famulantin für 4 Wochen mit Ihnen in Ihrer Praxis. Ihrer Erfahrung nach – wann würde das Thema sexuell übertragbare Krankheiten normalerweise aufkommen?  Bei Schwerpunktpraxen / Zusatzausbildungen o.ä. – danach fragen als Einstieg: Weshalb haben Sie sich dafür entschieden, in diesem Bereich zu arbeiten / diese Art der Versorgung anzubieten?  Können sie von der letzten Patientin, die mit einem Anliegen aus dem Bereich sexuell übertragbarer Krankheiten in Ihre Praxis gekommen ist, berichten?  Haben Sie das Gefühl, die Situation durch Corona beeinflusst die Versorgung der Patientinnen mit anderen Anliegen – z.B. STI?  / Haben Sie das Gefühl, es kommen weniger Patientinnen als sonst mit solchen Anliegen? | - Wie häufig haben Sie solche oder ähnliche Fälle bei sich in der Praxis? - Mit welchen anderen Beratungsanlässen aus dem Bereich STI kommen Frauen typischerweise zu Ihnen in die Praxis? | Können Sie mir den Fall / den Verlauf noch ausführlicher beschreiben?  Wie war das für Sie? |

|  | Ich würde nun gerne ein erstes Fallbeispiel vorstellen – wie besprochen, geht es uns bei den Fallbeispielen nicht um das Abprüfen von Wissen, sondern ganz pragmatisch um den Alltag in der Praxis, über den Sie als Hausarzt / als Hausärztin am besten Bescheid wissen.  Im ersten Fall soll es zunächst um eine Patientin gehen, die mit konkreten Symptomen in Ihre Praxis kommt, und Ihren grundsätzlichen Umgang damit. (Ausdruck geben und vorlesen)  Können Sie beschreiben, wie Sie mit solchen Fällen bisher in Ihrer Praxis umgegangen sind? | - Wenn nötig Fall konkretisieren: Sexualkontakt nach Tinder-Date, ungeschützt - Wie häufig haben Sie solche oder ähnliche Fälle bei sich in der Praxis? - Worauf achten Sie, wenn Sie bei dieser Patientin die Anamnese erheben? - Welche Diagnostik bieten Sie dieser Patientin an? Welche Diagnostik bieten Sie im Bereich STI grundsätzlich in Ihrer Praxis an? - Welche Therapie würden Sie einleiten? Welche STIs therapieren Sie in Ihrer Praxis? - Inwiefern würden Sie über weitere Präventionsmöglichkeiten mit der Patientin sprechen? / Würden Sie weitere Punkte mit der Patientin besprechen? | Und wie würden Sie weiter vorgehen?  Mich würde noch genauer interessieren…  Wir unterhalten uns heute explizit über sexuell übertragbare Krankheiten. Außerhalb eines solchen Kontexts ist es üblich, bei Verdacht auf HWI ohne Abstrichentnahme Antibiotika zu verschreiben. Wenn Sie an Ihren Praxisalltag denken –würden Sie normalerweise bei Verdacht auf HWI STIs mitberücksichtigen?  Wenn ja, wann? Immer? Nur in bestimmten Konstellationen? |
| --- | --- | --- | --- |
| Flexible Zwischenfragen | Was glauben Sie, wie gut oder schlecht werden Patientinnen in der Regel in solchen Fällen versorgt?  Welche Assoziationen oder Gefühle lösen Patientinnen mit einem solchen Beratungsanlass bei Ihnen aus?  Bei Befragungen zum Thema STI unter Hausärzt*innen geben Kolleg*innen an, sich bei Patientengesprächen mitunter nicht wohlzufühlen. Gibt es Beratungsanlässe, die Ihnen vielleicht irgendwie unangenehm sind? Welche?  Ggf. nachhaken – gibt es auch Beratungsanlässe bei Frauen, die Ihnen unangenehm sind?  Wenn nicht, warum nicht?    Gab es Patient*innen oder Situationen, die Ihnen besonders in Erinnerung geblieben sind?  Warum glauben Sie, war gerade diese Patient*in so eindrücklich? | In anderen Gesundheitssystemen, beispielsweise in den Niederlanden, sind Hausärzt*innen erste Ansprechpartner*innen bei vielen Themen der sexuellen Gesundheit. Wie stehen Sie dazu – im Vergleich zu unserem eher Gynäkologisch-orientiertem System?  Es gibt, gerade auch in Berlin, spezialisierte Schwerpunktpraxen für STI und HIV. Wie finden Sie dieses System?  Wer sind Ansprechpartner*innen für Nicht-Risikogruppen?  Gibt es bestimmte Patient*innen, bei denen es Ihnen leichter oder schwerer fällt, empathisch zu reagieren?  Wohin würden Sie Personen aus Ihrem persönlichen Umfeld für einen STI Test schicken? | Welche Informationsquellen nutzen Sie beim Thema STI?  Würden Sie sagen, Sie haben ein persönliches Interesse für STI und deren Versorgung?  Wie würden Sie Ihre eigene Ausbildung bezüglich sexueller Gesundheit beschreiben? |

| B Vernetzung | Wir haben jetzt ausführlich über Patientinnen mit eigenen Symptomen gesprochen, das war schon sehr aufschlussreich. Ich würde nun gerne ein neues Fallbeispiel beschreiben, hier soll es um eine konkrete Risikokonstellation und die Vernetzung zwischen verschiedenen Versorgern. | - Wie häufig haben Sie solche oder ähnliche Fälle bei sich in der Praxis? - In welchen Situationen überweisen Sie Patientinnen an andere Versorger*innen / Einrichtungen? - An wen überweisen Sie Patientinnen? - Welche Rolle spielt das Gesundheitsamt in der Versorgung? Welche Rolle spielen Beratungsstellen? - Inwiefern tauschen sie sich mit anderen Versorger*innen aus? - Wer ist aus Ihrer Sicht am ehesten für die Versorgung der Patient*innen verantwortlich? - Verfolgen Sie den therapeutischen Verlauf der überwiesenen Patient*innen? | Sie haben schon x und y als weitere Versorger*innen genannt. Überweisen Sie auch manchmal an z?  Können Sie noch genauer beschreiben, wie die Zusammenarbeit aussieht?  Verstehe ich richtig, dass Sie x mehr in der Verantwortung sehen als y? |
| --- | --- | --- | --- |

| C- Risikoeinschätzung | Im dritten und letzten Fallbeispiel interessiert uns die Verfügbarkeit präventiver Angebote, diesmal ohne konkreten Anlass. | - Wie häufig haben Sie solche oder ähnliche Fälle bei sich in der Praxis? - Was erfragen Sie, um das Risiko der Patientin einzuschätzen? - Wie hoch oder niedrig schätzen Sie das Risiko in diesem Fall ein? - Was würden Sie der Patientin in dieser Situation anbieten? (Was wird getestet?) - Worauf basiert Ihre Entscheidung oder Einschätzung? - Was verstehen Sie unter epidemiologischen Risiken? Welche Rolle spielt das im Praxisalltag / bei Ihren Patientinnen? - Wie rechnen Sie STI Diagnostik ab? | Verstehe ich Sie richtig, dass Sie vor allem darauf achten, zu welcher Gruppe eine Patientin gehört? |
| --- | --- | --- | --- |

| D - Individual und Bevölkerungsmedizin | Die Infektionszahlen verschiedener sexuell übertragbarer Krankheiten sind in den letzten Jahren in Deutschland angestiegen. Was könnten aus Ihrer Sicht Strategien sein, um die Ansteckungsrate zu senken? | - Kennen Sie die Public Health Kampagnen / die Kampagne Liebesleben der BzgA? Wenn ja, wie finden Sie die Kampagne? - Welchen Effekt denken Sie, haben solche Kampagnen? - Wer ist Ihrer Meinung nach am ehesten dafür zuständig, Maßnahmen für die Senkung von Infektionszahlen einzuleiten? - Inwiefern sollten Hausärzt*innen Ihrer Meinung nach einen Beitrag zur Senkung der Infektionszahlen leisten? | Meinten Sie, dass die Kampagne einen konkreten Einfluss auf das individuelle Verhalten der Menschen hat?  Verstehe ich Sie richtig, dass Sie denken, der öffentliche Gesundheitsdienst ist für eine Senkung von Infektionszahlen eher zuständig als Hausärzt*innen oder andere Fachgruppen? |
| --- | --- | --- | --- |
| E – Hürden und Perspektiven | Wir kommen jetzt zur letzten Frage. Wenn Sie sich etwas wünschen könnten – was sollte sich aus Ihrer Sicht ändern, um die Versorgung für sexuell übertragbare Krankheiten zu verbessern? | - Was schränkt die optimale Versorgung von Patientinnen in ihrem Praxisalltag ein? - Was schränkt für Sie die optimale Zusammenarbeit mit anderen Akteuren ein? - Haben Sie Vorschläge, was verbessert werden könnte? | Können Sie mir dazu vielleicht nochmal ein Beispiel beschreiben? |
|  | Gibt es Punkte, die Ihnen wichtig sind, die wir noch nicht angesprochen haben? | Nochmal checken ob alles angesprochen wurde |  |

# Anhang 2: Fallbeispiele

## Fall 1 – Frau West

Die 44-jährige Frau West war bereits mehrfach bei Ihnen in der Praxis.

Heute klagt sie über Schmerzen beim Wasserlassen, die seit gestern bestünden, sowie verstärkten Ausfluss aus der Vagina. Sie kenne die Schmerzen von früheren Blasenentzündungen, allerdings habe sie schon lange keine Blasenentzündung mehr gehabt, und der Ausfluss wäre neu. Sie hätte gerne eine AU-Bescheinigung und etwas zur Linderung der Beschwerden.

## Fall 2 – Frau Leine

Frau Leine ist eine 23-jährige, Ihnen bekannte Patientin. Sie kommt zu Ihnen, weil ein Mann, mit dem sie vor zwei Wochen Geschlechtsverkehr hatte, sie gestern angerufen hat – er wäre beim Gesundheitsamt gewesen und hätte eine Syphilis-Diagnose bekommen.

Frau Leine ist sehr besorgt und hat viele Fragen. Sie möchte wissen, ob Syphilis schlimm ist, ob sie sich angesteckt haben kann, und wie es jetzt weitergeht. Sie fragt, ob sie hier bei Ihnen überhaupt richtig sei, oder ob sie sich besser an das Gesundheitsamt wenden solle.

## Fall 3 – Frau Biancharelli

Frau Biancharelli ist eine 32-jährige Patientin, die zu Ihnen in die Praxis kommt. Sie würde sich gerne absichern, dass sie keine Geschlechtskrankheiten hat.

Hin und wieder hätte sie ungeschützten Geschlechtsverkehr gehabt. In den letzten Jahren sei sie Single gewesen und hätte mit regelmäßig wechselnden Sexualpartnern geschlafen.

Sie habe keine Symptome, hätte aber gelesen, dass viele der sexuell übertragbaren Krankheiten auch ganz unauffällig verlaufen könnten. Freundinnen hätten ihr erzählt, dass ein Test auf STI viel Geld kosten würde – sie sei Geringverdienerin und könne sich dies nicht leisten.

# Anhang 3: Codebaum

| 1 Verantwortungsgefühl | 4 Wissen - Schwerpunkte |
| --- | --- |
| 2 Handlungsbedingungen - Strukturelles | 4.1 Wissen, Informationsquellen |
| 2.1 Struktur und Versorgungslage | 4.2 STI Aus- und Fortbildung |
| 2.2 Wahrnehmung Ärzt:innen und Berufspolitik | 4.3 Ausbildung, Karriere |
| 2.3 Wahrnehmung anderer Akteure | 4.4 Fachliche Schwerpunkte |
| 2.4 Anlässe, Inanspruchnahme, Patientenklientel | 5 Versorgungsstrategien |
| 2.5 Stadt-Land Unterschiede | 5.1 Anamnese und Risikoeinschätzung |
| 2.6 Abrechnungsmöglichkeiten / Vergütung | 5.2 Diagnostik und Therapie |
| 2.7 Ausstattung, Zeit | 5.3 Public Health / Prävention in der Praxis |
| 2.8 Datenschutz | 5.4 Gesprächsangebot – Beratung |
| 3 Einstellungen | 5.5 Abrechnungsstrategien |
| 3.1 Persönliche Haltung – Sexualität und Risiko | 5.6 Koordination und Zusammenarbeit Ärzt:innen |
| 3.2 Hausärztliche Rolle / Eigenwahrnehmung | 5.7 Überweisung Ärzt:innen |
| 3.3 Patient:innen – Bedürfnisse, Kompetenzen | 5.8 Überweisung und Zusammenarbeit ÖGD/NRO |
| 3.4 Verantwortung der Patient:innen - Verhütung | 5.9 Überweisung und Zusammenarbeit Kliniken |
| 3.5 Unangenehme Anlässe |  |
| 3.6 Präferenzen für Patient:innen |
| 3.7 Anekdoten |
| 3.8 Public Health Maßnahmen |
| 3.9 Gesellschaftliche Haltung – Sexualität und STI |

# 
